# Supplementary material for: In Vitro Antibacterial Activity of Biological-Derived Silver Nanoparticles: Preliminary Data
Source: PubMed Central journal article supplement (PMC7157719; doi:10.3390/vetsci7010012), 2020-01-23
Supplement: vetsci-07-00012-s001.pdf [file vetsci-07-00012-s001.pdf]

Article

# *In vitro* antibacterial activity of biological-derived silver nanoparticles: preliminary data

Gabriele Meroni<sup>1,2,\*</sup>, Joel F. Soares Filipe<sup>1</sup> and Piera A. Martino<sup>1</sup>

<sup>1</sup> Department of Veterinary Medicine, Università degli Studi di Milano, Lodi, 26900, Italy

<sup>2</sup> Department of Biomedical Sciences for Health, Università degli Studi di Milano, Milano, 20133, Italy

\* Correspondence: gabriele.meroni@unimi.it; Tel.: +39 0250315326

Received: date; Accepted: date; Published: date

## Supplementary materials

### Biofilm forming ability of *Pseudomonas* and *Staphylococcus* strains

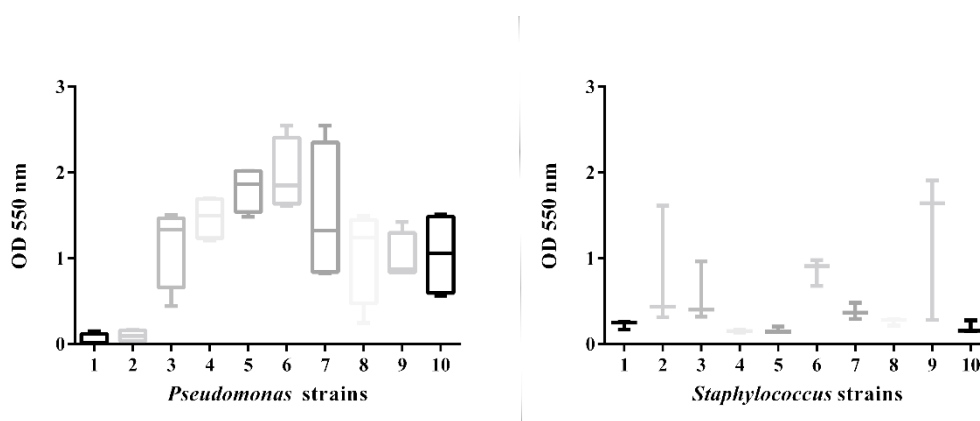

**Figure S1.** Optical densities of all the strains as measured following the method described by Stepanović. 2007. After MtP assay, among the 10 *Pseudomonas* strains, 8 were considered strongly biofilm producers. Among the 10 *S. pseudintermedius* strains 4 resulted non biofilm-producers, 2 weakly producers and 4 strongly producers.

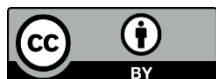

© 2020 by the authors. Licensee MDPI, Basel, Switzerland. This article is an open access article distributed under the terms and conditions of the Creative Commons Attribution (CC BY) license (<http://creativecommons.org/licenses/by/4.0/>).
